# Supplementary material for: DDA1, a novel factor in transcription-coupled repair, modulates CRL4CSA dynamics at DNA damage-stalled RNA polymerase II
Source: Research Square preprint supplement (doi:10.21203/rs.3.rs-3385435/v1), 2023-10-12
Supplement: Supplementary file 2 [file 3554f0f01326bbca4280de0b.docx]

Data deposition

Proteomic data have been deposited at ProteomeXchange.

Submission details:

**Project Name:** DDA1, a novel factor in transcription-coupled repair, modulates CRL4CSA dynamics at DNA damage-stalled RNA polymerase II

**Project accession:** PXD045415

**Project DOI:** Not applicable

Reviewer account details:

**Username:** [reviewer_pxd045415@ebi.ac.uk](mailto:reviewer_pxd045415@ebi.ac.uk)

**Password:** jf8CJSaV
